# Supplementary material for: Feasibility and Acceptability of Personalized Breast Cancer Screening (DECIDO Study): A Single-Arm Proof-of-Concept Trial
Source: MDPI journal article supplement (doi:10.3390/ijerph191610426), 2022-08-21
Supplement: s1 [file s1]

**Table S1** Breast cancer screening recommendations according to the absolute risk of breast cancer at 5 years

| Age group (years) | Absolute risk of breast cancer at 5 years | Screening recommendations                                      |
|-------------------|-------------------------------------------|----------------------------------------------------------------|
| 40-44             | < 0.99%                                   | Watch and wait                                                 |
|                   | 0.99%-1.16%                               | Biennial                                                       |
|                   | > 1.16%                                   | Annual                                                         |
| 45-48             | < 0.99%                                   | Watch and wait                                                 |
|                   | 0.99%-1.19%                               | Biennial                                                       |
|                   | > 1.19%                                   | Annual                                                         |
| 49-50             | < 0.8%                                    | Triennial                                                      |
|                   | 0.8%-1.19%                                | Biennial                                                       |
|                   | > 1.19%                                   | Annual                                                         |
| 40-50             | > 6%                                      | Referral to the hospital breast unit and/or genetic counseling |

Absolute risk of breast cancer at 5 years for average women in Catalonia (Spain) aged 45 years: 0.8%; 50 years: 0.99%; 60 years: 1.16%; 65 years: 1.19%.

Source: Pons-Rodriguez A, Forné Izquierdo C, Vilaplana-Mayoral J, Cruz-Esteve I, Sánchez-López I, Reñé-Reñé M, et al. Feasibility and acceptability of personalised breast cancer screening (DECIDO study): Protocol of a single-arm proof-of-concept trial. *BMJ Open* 2020;10. doi:[10.1136/bmjopen-2020-044597](https://doi.org/10.1136/bmjopen-2020-044597)
